# Supplementary material for: Smartphone Apps Targeting Hazardous Drinking Patterns among University Students Show Differential Subgroup Effects over 20 Weeks: Results from a Randomized, Controlled Trial
Source: PubMed Central journal article supplement (PMC6912621; doi:10.3390/jcm8111807), 2019-10-28
Supplement: jcm-08-01807-s001.pdf [file jcm-08-01807-s001.pdf]

**Table S1.** Response parameters of Hidden Markov Model.

| <b>Hidden state/<br/>drinking level <sup>a</sup></b> | <b>Abstinent</b> | <b>Moderate</b> | <b>Excessive</b> |
|------------------------------------------------------|------------------|-----------------|------------------|
| Monday                                               | 0.95             | 0.04            | 0.01             |
| Tuesday                                              | 0.91             | 0.07            | 0.02             |
| Wednesday                                            | 0.75             | 0.21            | 0.04             |
| Thursday                                             | 0.86             | 0.11            | 0.03             |
| Friday                                               | 0.29             | 0.37            | 0.33             |
| Saturday                                             | 0.25             | 0.33            | 0.42             |
| Sunday                                               | 0.92             | 0.08            | 0.01             |
| <b>Frequent-heavy drinkers</b>                       | <b>0.32</b>      | <b>0.49</b>     | <b>0.20</b>      |

a. Response parameters were proportions of abstinence, moderate drinking and excessive drinking per hidden state.

**Table S2.** Transition Matrix for the eight latent classes identified in the Hidden Markov analysis of 2166 university students with moderate or excessive alcohol use, participating in randomized controlled app trials to reduce consumption.

| <b>To: →<br/>From: ↓</b>           | <b>Monday</b> | <b>Tuesday</b> | <b>Wednesday</b> | <b>Thursday</b> | <b>Friday</b> | <b>Saturday</b> | <b>Sunday</b> | <b>Frequent-heavy<br/>drinkers</b> |
|------------------------------------|---------------|----------------|------------------|-----------------|---------------|-----------------|---------------|------------------------------------|
| Sunday                             | 1             |                |                  |                 |               |                 |               |                                    |
| Monday                             |               | 1              |                  |                 |               |                 |               |                                    |
| Tuesday                            |               |                | 1                |                 |               |                 |               |                                    |
| Wednesday                          |               |                |                  | 1               |               |                 |               |                                    |
| Thursday                           |               |                |                  |                 | 0.99          | 0.01            |               |                                    |
| Friday                             |               |                |                  |                 |               | 1               |               |                                    |
| Saturday                           |               |                |                  |                 |               |                 | 1             |                                    |
| <b>Frequent-heavy<br/>drinkers</b> |               |                |                  |                 | <b>0.01</b>   |                 |               | <b>0.99</b>                        |

**Table S3.** Associations between Promillekoll intervention group and drinking days within the subgroup of frequent-heavy drinkers (n=146).

|                      | Drinking day (Y/N) |           |            |        |
|----------------------|--------------------|-----------|------------|--------|
|                      | Odds Ratio         | CI        | std. Error | p      |
| <b>Fixed Parts</b>   |                    |           |            |        |
| (Intercept)          | 2.28               | 1.70–3.07 | 0.34       | <0.001 |
| Control*             | 0.66               | 0.46–0.96 | 0.12       | 0.029  |
| PartyPlanner*        | 0.90               | 0.58–1.41 | 0.20       | 0.650  |
| Time                 | 0.98               | 0.97–1.00 | 0.01       | 0.052  |
| Age                  | 1.01               | 1.00–1.02 | 0.01       | 0.029  |
| Sex                  | 0.98               | 0.79–1.21 | 0.10       | 0.833  |
| Control* X Time      | 1.03               | 1.01–1.05 | 0.01       | 0.004  |
| PartyPlanner* X Time | 1.01               | 0.99–1.04 | 0.01       | 0.270  |
| <b>Random Parts</b>  |                    |           |            |        |
| $\tau_{00, id}$      |                    | 0.179     |            |        |
| $N_{id}$             |                    | 146       |            |        |
| $ICC_{id}$           |                    | 0.052     |            |        |
| Observations         |                    | 3381      |            |        |
| Deviance             |                    | 4161.433  |            |        |

*Note.* \* Promillekoll is the reference category. The fitted model is a generalized linear mixed model with a binomial link function (R library lme4). A random intercept is fitted for each participant in the analysis. A random slope model did not lead to a better fit based on anova comparison, and overall led to very similar results. The dependent variable Drinking day indicates whether the participant drank alcohol on each of the 28 days for which data were collected. See also Figure 4a.

**Table S4.** Associations between TeleCoach group and drinking days within the subgroup of frequent-heavy drinkers (n=146).

|                         | Drinking day (Y/N) |           |            |        |
|-------------------------|--------------------|-----------|------------|--------|
|                         | Odds Ratio         | CI        | std. Error | p      |
| <b>Fixed Parts</b>      |                    |           |            |        |
| (Intercept)             | 3.12               | 1.80–5.39 | 0.87       | <0.001 |
| Assessment-only*        | 0.54               | 0.31–0.96 | 0.16       | 0.037  |
| Wait list*              | 0.79               | 0.36–1.76 | 0.32       | 0.568  |
| Time                    | 0.95               | 0.93–0.98 | 0.01       | 0.001  |
| Age                     | 1.01               | 1.00–1.02 | 0.01       | 0.058  |
| Sex                     | 0.99               | 0.80–1.22 | 0.11       | 0.916  |
| Assessment-only* X Time | 1.06               | 1.03–1.09 | 0.02       | <0.001 |
| Wait list* X Time       | 1.03               | 0.99–1.08 | 0.02       | 0.144  |
| <b>Random Parts</b>     |                    |           |            |        |
| $\tau_{00, id}$         |                    | 0.186     |            |        |
| $N_{id}$                |                    | 146       |            |        |
| $ICC_{id}$              |                    | 0.054     |            |        |
| Observations            |                    | 3381      |            |        |
| Deviance                |                    | 4150.276  |            |        |

*Note.* \* TeleCoach is the reference category. The fitted model is a generalized linear mixed model with a binomial link function (R library lme4). A random intercept is fitted for each participant in the analysis. A random slope model did not lead to a better fit based on anova comparison, and overall led to very similar results. The dependent variable Drinking day indicates whether the participant drank alcohol on each of the 28 days for which data were collected. See also Figure 4b.
